# Supplementary material
Source: publisher site journal article supplement (https://kjim.org/upload/media/kjim-2024-041-Supplementary-Table-2.pdf)
Supplement: Supplementary file 1 [file kjim-2024-041-Supplementary-Table-2.pdf]

**Supplementary Table 2. Patient characteristics for first-line chemotherapy**

| Characteristic                      | Bortezomib-based | Lenalidomide-based | Alkylating agent-based | <i>p</i> value |
|-------------------------------------|------------------|--------------------|------------------------|----------------|
| Total                               | 27 (31.4)        | 17 (19.8)          | 42 (48.8)              |                |
| Age (yr)                            | 82 (80–87)       | 84 (80–90)         | 82 (80–88)             | 0.108          |
| Sex, male                           | 15 (55.6)        | 7 (41.2)           | 19 (45.2)              | 0.633          |
| ECOG PS                             |                  |                    |                        | 0.409          |
| 0                                   | 0 (0.0)          | 1 (5.9)            | 1 (2.4)                |                |
| 1                                   | 8 (29.6)         | 4 (23.5)           | 3 (7.1)                |                |
| 2                                   | 12 (44.4)        | 5 (29.4)           | 24 (57.1)              |                |
| 3                                   | 6 (22.2)         | 5 (29.4)           | 13 (31.0)              |                |
| 4                                   | 1 (3.7)          | 2 (11.8)           | 1 (2.4)                |                |
| CCI                                 |                  |                    |                        | 0.048          |
| ≤ 4                                 | 7 (25.9)         | 2 (11.8)           | 18 (42.9)              |                |
| > 4                                 | 20 (74.1)        | 15 (88.2)          | 24 (57.1)              |                |
| ISS                                 |                  |                    |                        | 0.740          |
| I                                   | 2 (7.4)          | 1 (5.9)            | 4 (9.5)                |                |
| II                                  | 6 (22.2)         | 3 (17.6)           | 11 (26.2)              |                |
| III                                 | 19 (70.4)        | 13 (76.5)          | 26 (61.9)              |                |
| R-ISS                               |                  |                    |                        | 0.869          |
| I                                   | 1 (3.7)          | 1 (5.9)            | 2 (4.8)                |                |
| II                                  | 11 (40.7)        | 5 (29.4)           | 14 (33.3)              |                |
| III                                 | 11 (40.7)        | 8 (47.1)           | 19 (45.2)              |                |
| High-risk cytogenetic abnormalities | 6 (24.0)         | 8 (53.3)           | 4 (11.8)               | 0.017          |
| Cycle                               | 3 (1–9)          | 3 (1–20)           | 3.5 (1–54)             | 0.050          |
| Early mortality                     | 2 (7.4)          | 3 (17.6)           | 8 (19.0)               | 0.414          |
| Response of treatment               |                  |                    |                        | 0.523          |
| sCR                                 | 1 (3.7)          | 0 (0.0)            | 1 (2.4)                |                |
| CR                                  | 2 (11.1)         | 1 (5.9)            | 2 (4.8)                |                |
| VGPR                                | 3 (11.1)         | 2 (11.8)           | 1 (2.4)                |                |
| PR                                  | 8 (29.6)         | 7 (41.2)           | 10 (23.8)              |                |
| MR                                  | 1 (3.7)          | 1 (5.9)            | 4 (9.5)                |                |
| SD                                  | 7 (25.9)         | 1 (5.9)            | 10 (23.8)              |                |
| PD                                  | 1 (3.7)          | 0 (0.0)            | 3 (7.1)                |                |
| Unknown                             | 3 (11.1)         | 5 (29.4)           | 11 (26.2)              |                |
| Median event free survival (mo)     | 13.4             | 8.5                | 9.6                    | 0.428          |

Values are presented as number (%) or median (range).

ECOG PS, Eastern Cooperative Oncology Group Performance Status; CCI, Charlson comorbidity index; ISS, International Staging System; R-ISS, Revised International Staging System; sCR, stringent complete response; CR, complete response; VGPR, very good partial response; PR, partial response; MR, minimal response; SD, stable disease; PD, progressive disease.
